# Supplementary material for: UDP-glucosyltransferase regulates grain size and abiotic stress tolerance associated with metabolic flux redirection in rice
Source: PubMed Central journal article supplement (PMC7250897; doi:10.1038/s41467-020-16403-5), 2020-05-26
Supplement: 41467_2020_16403_MOESM1_ESM.pdf [file 41467_2020_16403_MOESM1_ESM.pdf]

**UDP-glucosyltransferase regulates grain size and abiotic stress  
tolerance associated with metabolic flux redirection in rice**

Dong *et al.*

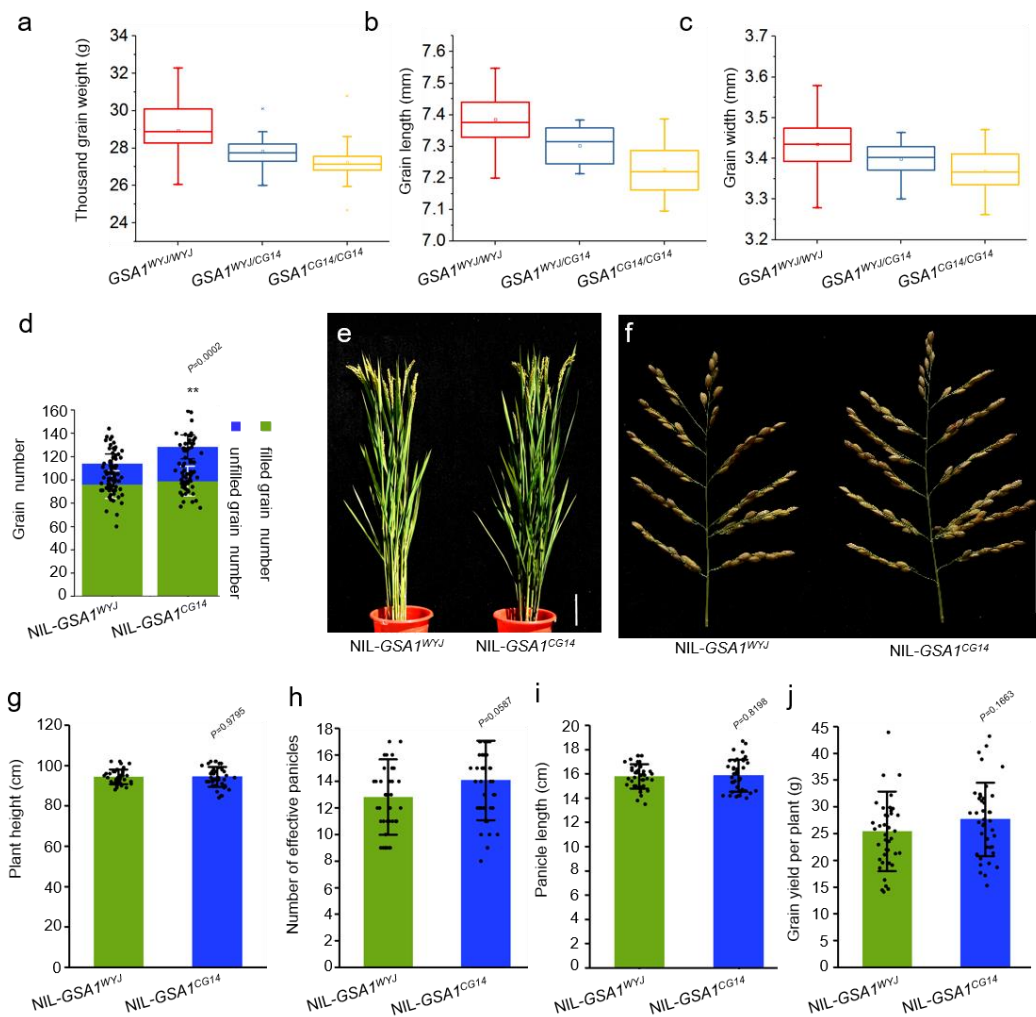

**Supplementary Figure 1. Phenotype of  $NIL-GSAI^{WYJ}$  and  $NIL-GSAI^{CG14}$ .**

**a-c**, Comparison of 1,000-grain weight (**a**), grain length (**b**) and grain width (**c**) among lines  $GSAI^{WYJ/WYJ}$ ,  $GSAI^{CG14/CG14}$  and  $GSAI^{WYJ/CG14}$ . The red boxplots indicate the lines in the segregating population with the genotype  $GSAI^{WYJ/WYJ}$ , which contains the target fragment originating from WYJ; blue box-plots indicate lines with the genotype  $GSAI^{WYJ/CG14}$ , which are heterozygous for the target fragment, and the yellow box-plots indicate lines with the genotype  $GSAI^{CG14/CG14}$ , which contain the target fragment originating from CG14. The centre line, box limits and whiskers represent mean, 25% and 75% confidence limits, and min and max values, respectively. **d**, Comparison of grain number per panicle between  $NIL-GSAI^{WYJ}$  and  $NIL-GSAI^{CG14}$ . **e, f**, Plant architecture (**e**) and main panicle (**f**) of  $NIL-GSAI^{WYJ}$  and  $NIL-GSAI^{CG14}$ . Scale bar, 10 cm (**e**), 5 cm (**f**), respectively. **g-j**, Comparison of plant height (**g**), number of effective panicles (**h**), panicle length (**i**) and grain yield per plant (**j**) between  $NIL-GSAI^{WYJ}$  and  $NIL-GSAI^{CG14}$ . The values in **d** and **g-j** represent the mean  $\pm$  s.d. ( $n = 40$  plants).

\*\* $P < 0.01$  indicates significant differences compared with NIL-GSA1<sup>WYJ</sup> in two-tailed Student's *t*-tests.

Source data underlying Supplementary Figure 1a-d and 1g-j are provided as a Source Data file.

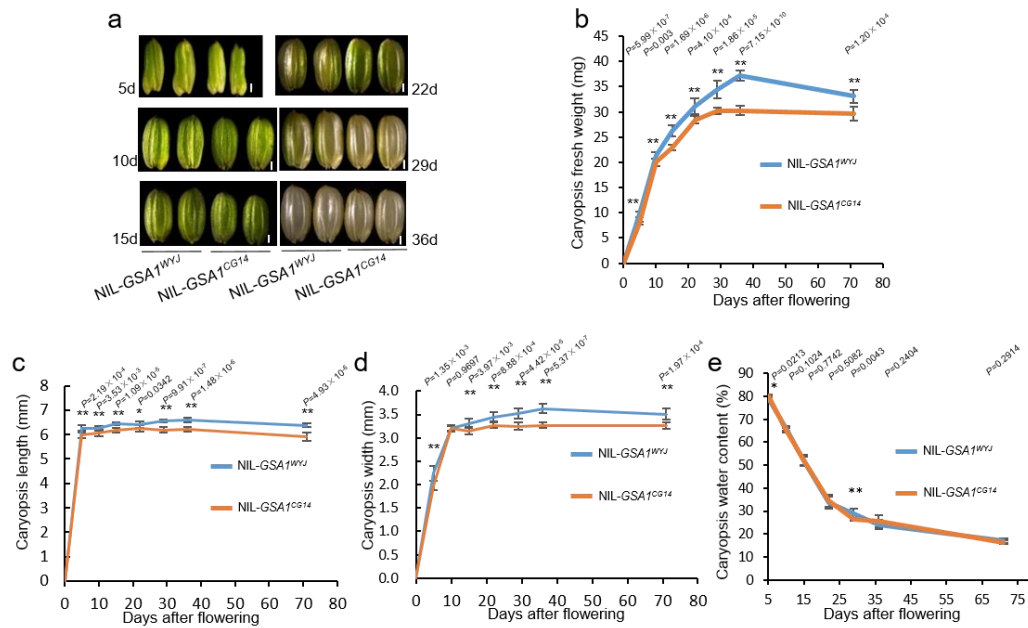

### Supplementary Figure 2. Caryopsis development in NIL-GSA1<sup>WYJ</sup> and NIL-GSA1<sup>CG14</sup>.

**a**, Caryopses at 5 days, 10 days, 15 days, 22 days, 29 days and 36 days after flowering of NIL-GSA1<sup>WYJ</sup> and NIL-GSA1<sup>CG14</sup>. Scale bar, 1 mm. **b-e**, Time-course of the change in caryopsis fresh weight (**b**), caryopsis length (**c**), caryopsis width (**d**), caryopsis water content (**e**) of NIL-GSA1<sup>WYJ</sup> and NIL-GSA1<sup>CG14</sup>. The values in **b-e** represent the mean  $\pm$  s.d. ( $n = 8$  plants, 40 caryopses per plant). \* $P < 0.05$  and \*\* $P < 0.01$  indicate significant differences compared with NIL-GSA1<sup>WYJ</sup> in two-tailed Student's *t*-tests. Source data underlying Supplementary Figure 2b-e are provided as a Source Data file.

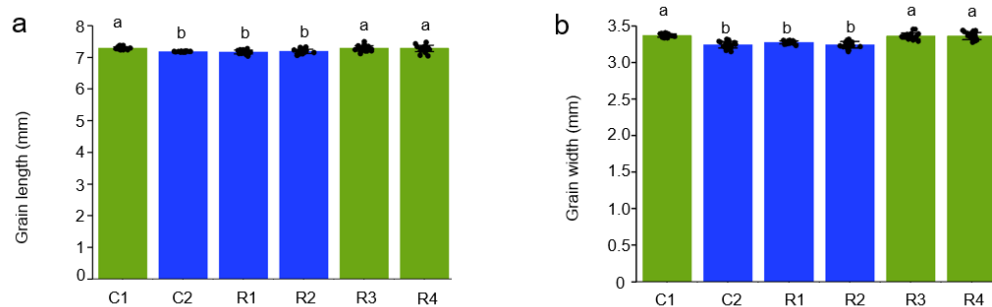

**Supplementary Figure 3. Grain length and grain width of recombinant lines.**

**a, b,** Grain length (**a**) and grain width (**b**) of representative recombinant lines C1, C2, R1, R2, R3 and R4 in Figure 1f. The values in **a** and **b** represent the mean  $\pm$  s.d. ( $n = 20$  plants). Different letters indicate significant differences ( $P < 0.05$ ) determined by Duncan's multiple range test. Source data are provided as a Source Data file.

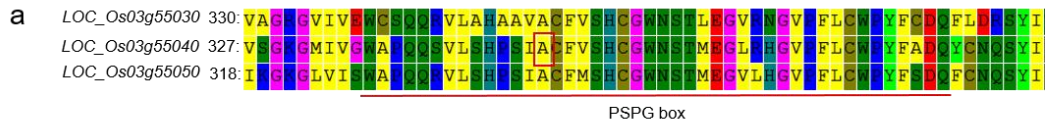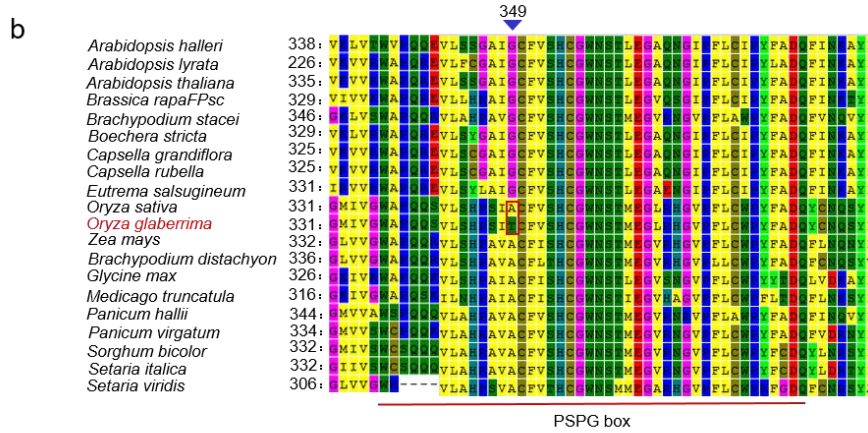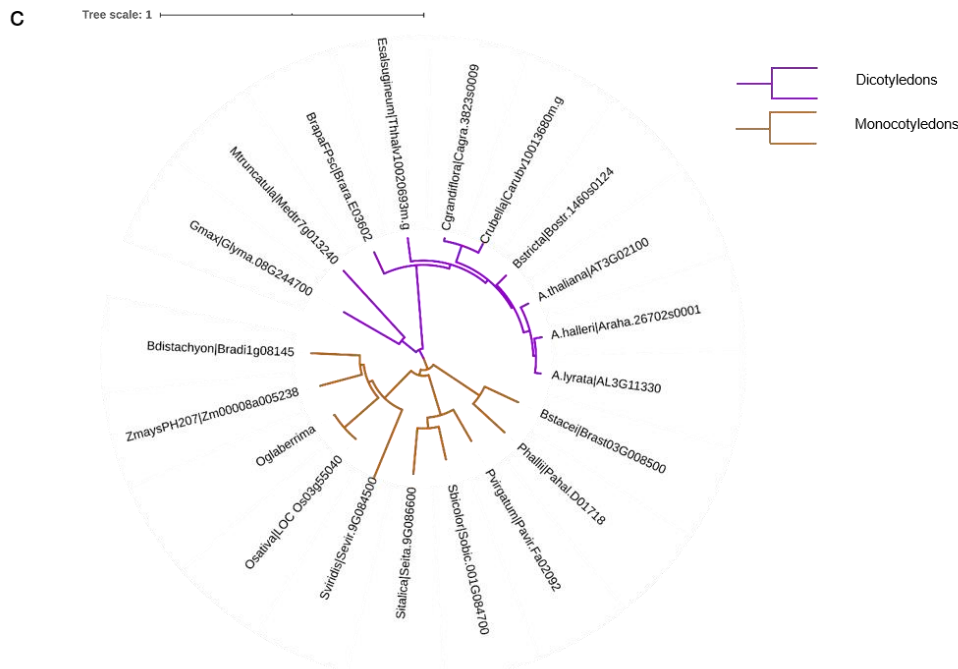

**Supplementary Figure 4. Natural variation in the PSPG box of GSA1.**

**a**, Alignment of partial GSA1 homologous UGT amino acid sequence in the target region. **b**, Amino acid sequence alignment of partial GSA1 homologous peptide sequences from monocots and dicots. **a, b**, The red line indicates the PSPG box domain. The red box indicates the substitution site (T349 in *O. glaberrima* CG14). An alanine residue at this site contained in the PSPG box is highly conserved across monocots. **c**, Neighbor-joining tree using variants in GSA1 with its homologs amino acid sequence. The brown branches and purple branches indicate monocot and dicot sequences, respectively.



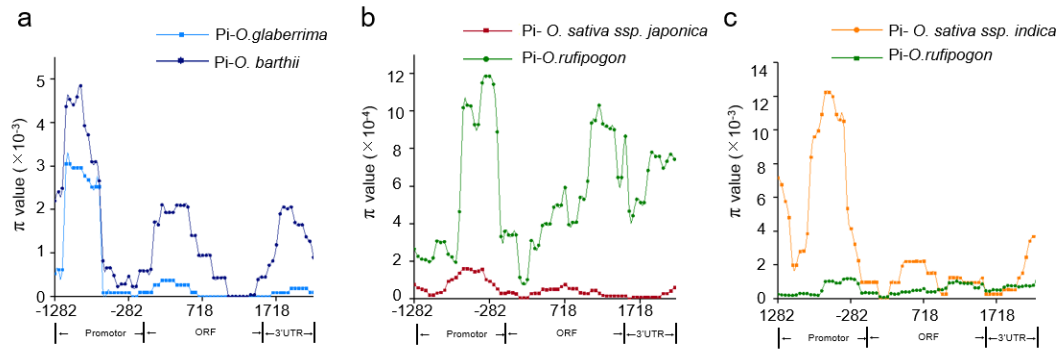

**Supplementary Figure 6. Nucleotide diversity analysis of *GSAI*.**

**a-c**, Nucleotide diversity ( $\pi$ ) analysis of the *GSAI* promoters and entire ORF of *O. glaberrima* and *O. barthii* (**a**), *O. sativa ssp. japonica* and *O. rufipogon* (**b**) and *O. sativa ssp. indica* and *O. rufipogon* (**c**). Sliding-window analysis of the nucleotide diversity ( $\pi$ ) was performed in a region of ~3.3kb using a 500-bp window and 50-bp steps. Source data are provided as a Source Data file.

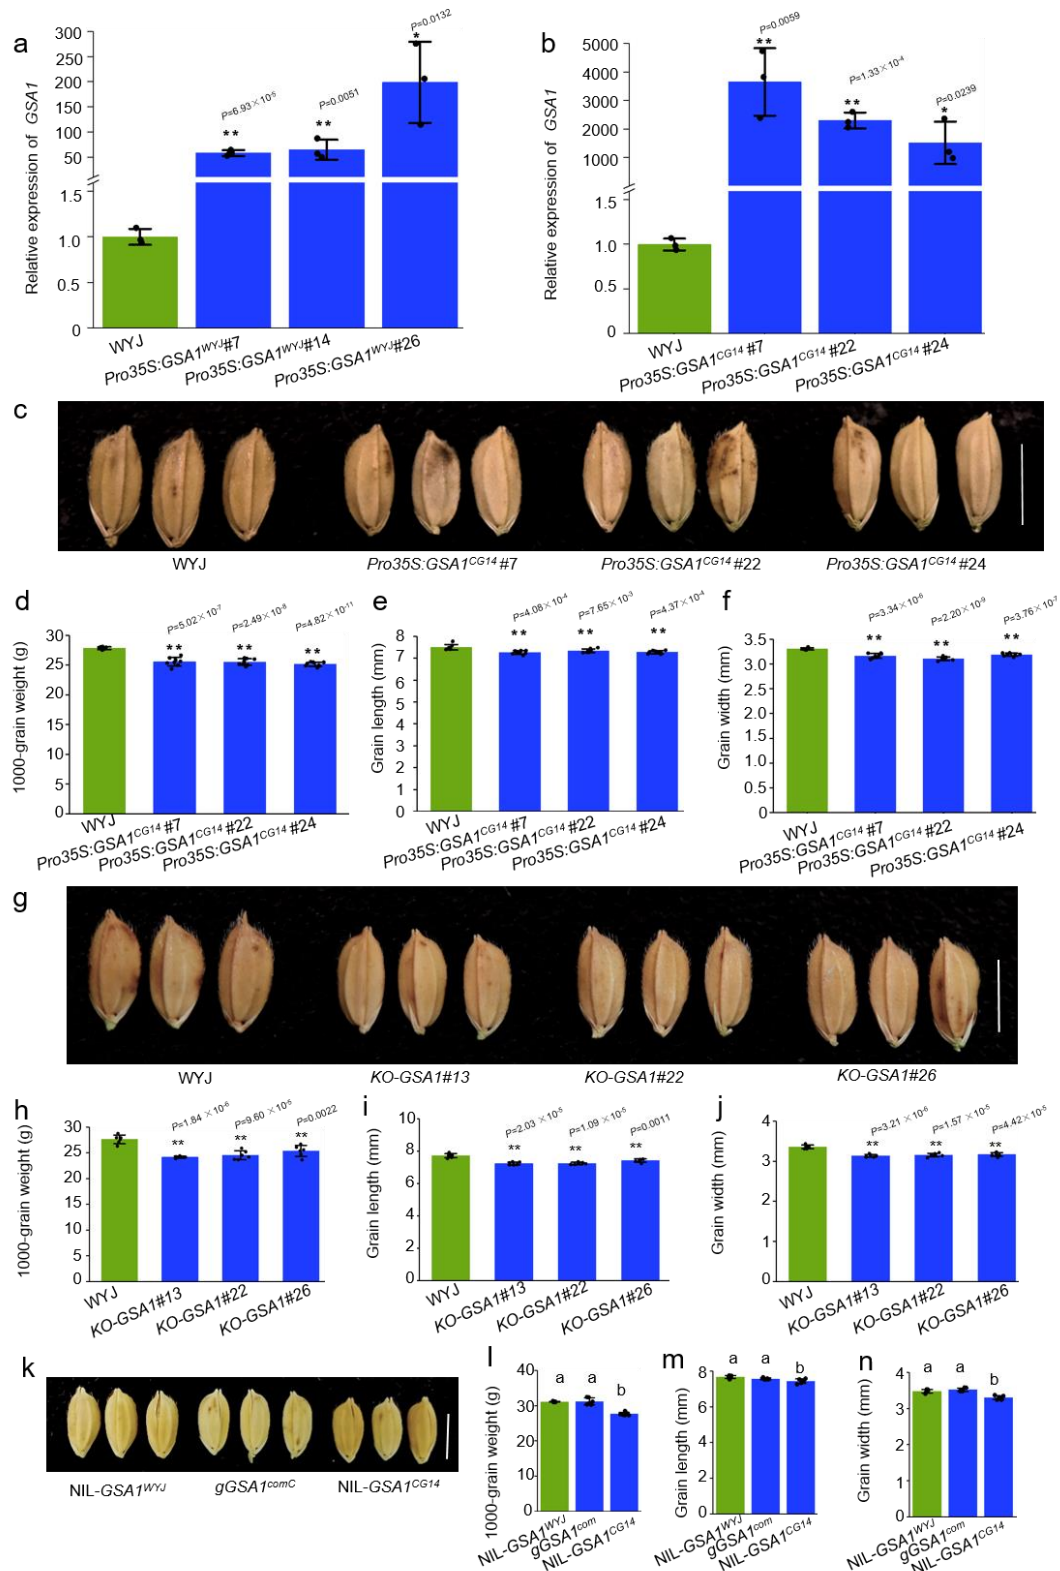

### Supplementary Figure 7. Phenotypes of *GSA1* transgenic lines.

**a**, Relative expression levels of *GSA1* determined by qRT-PCR in WYJ and overexpression lines *Pro35S:GSA1*<sup>WYJ</sup>#7, *Pro35S:GSA1*<sup>WYJ</sup>#14 and *Pro35S:GSA1*<sup>WYJ</sup>#26 ( $n = 3$  biological replicates). **b**, Relative expression of *GSA1* determined by qRT-PCR in WYJ and overexpression lines *Pro35S:GSA1*<sup>CG14</sup>#7, *Pro35S:GSA1*<sup>CG14</sup>#22 and *Pro35S:GSA1*<sup>CG14</sup>#24 ( $n = 3$  biological replicates).



**a, b**, The ubiquitin gene was used for normalization. **c**, Mature grains of WYJ and the *GSAI<sup>CG14</sup>* overexpression lines. Scale bar, 5 mm. **d-f**, Comparison of 1,000-grain weight (**d**), grain length (**e**) and grain width (**f**) between WYJ and overexpression lines ( $n = 8$  plants). **g**, Mature grains of WYJ and the CRISPR-Cas9 knock-out transgenic lines *KO-GSAI#13*, *KO-GSAI#22* and *KO-GSAI#26*. Scale bar, 5 mm. **h-j**, Comparison of 1,000-grain weight (**h**), grain length (**i**) and grain width (**j**) between WYJ and knock-out transgenic lines ( $n = 6$  plants). \* $P < 0.05$  and \*\* $P < 0.01$  indicate significant differences compared with WYJ in two-tailed Student's *t*-tests. **k**, Mature grains of *NIL-GSAI<sup>WYJ</sup>*, the complementation line *gGSAI<sup>com</sup>* and *NIL-GSAI<sup>CG14</sup>*. Scale bar, 5 mm. **l-n**, Comparison of 1,000-grain weight (**l**), grain length (**m**) and grain width (**n**) between *NIL-GSAI<sup>WYJ</sup>*, *gGSAI<sup>com</sup>* and *NIL-GSAI<sup>CG14</sup>* ( $n = 6$  plants). Different letters indicate significant differences ( $P < 0.05$ ) determined by Duncan's multiple range test. The values in **a, b, d-f, h-j** and **l-n** represent the mean  $\pm$  s.d.. Source data underlying Supplementary Figure 7a-b, 7d-f, 7h-j and 7l-n are provided as a Source Data file.

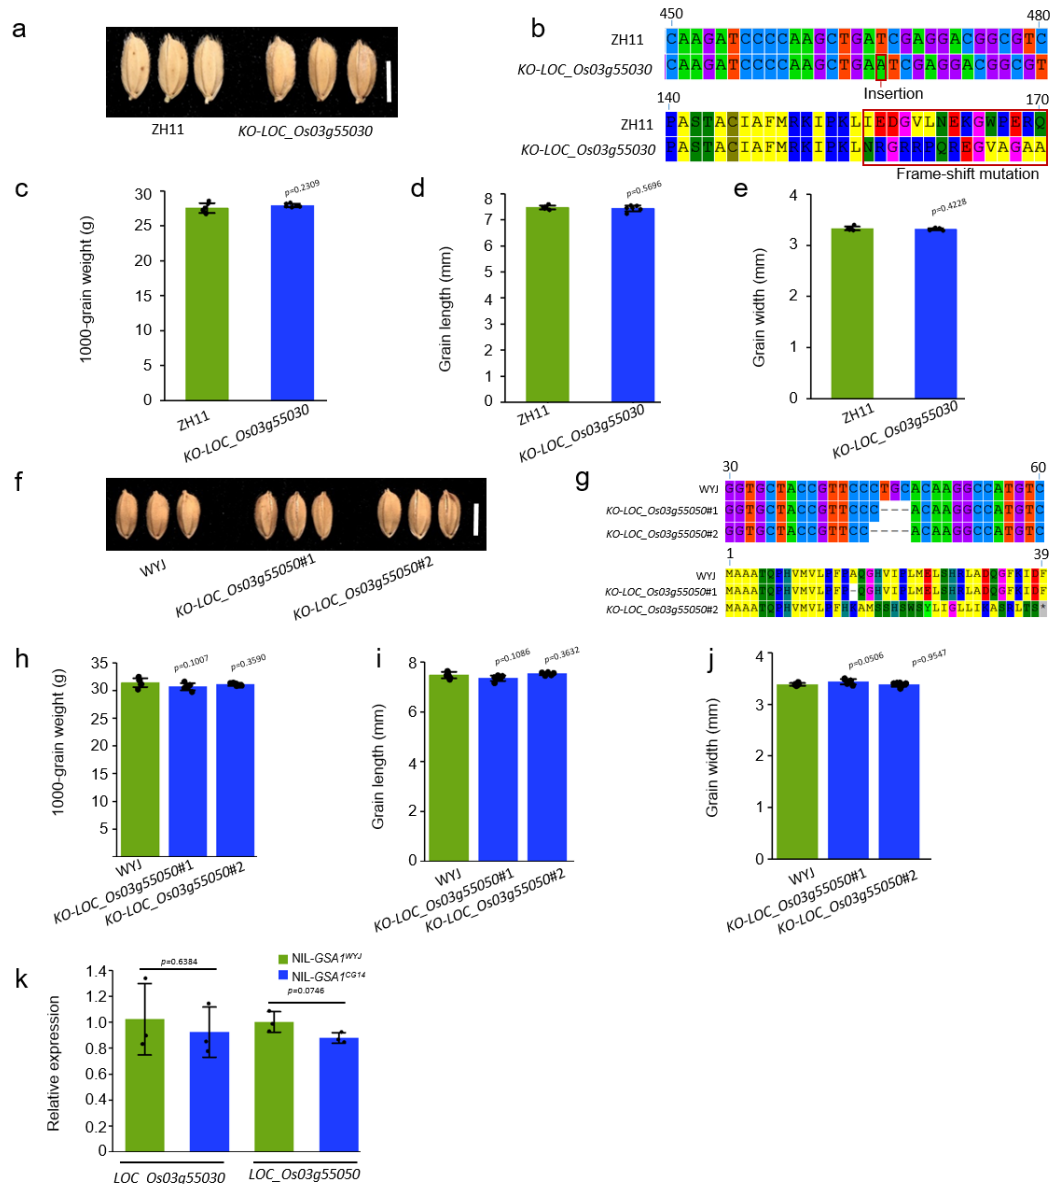

**Supplementary Figure 8. The other UGT genes within the *GSA1* target region have no effect on grain size.**

**a**, Mature grains of ZH11 and the homozygous CRISPR-Cas9 knock-out transgenic lines *KO-LOC\_Os03g55030*. Scale bar, 5 mm. **b**, Alignment of the nucleotide sequences (450-480, upper panel) and amino acid sequences (140-170, lower panel) of *LOC-Os03g55030* in ZH11 and *KO-LOC\_Os03g55030* showing the insertion of A466 (upper panel) and the resulting frameshift mutation (lower panel) in the mutant allele. **c-e**, Comparison of 1,000-grain weight (**c**), grain length (**d**) and grain width (**e**) between ZH11 and *KO-LOC\_Os03g55030* ( $n = 6$  plants). **f**, Mature grains of WYJ and the homozygous CRISPR-Cas9 knock-out transgenic lines *KO-LOC\_Os03g55050#1* and *KO-LOC\_Os03g55050#2*. Scale bar, 5 mm. **g**, Alignment of the nucleotide sequences (30-60, upper panel) and amino acid sequences (1-39, lower panel) of *LOC\_Os03g55050* in WYJ, *KO-LOC\_Os03g55050#1* and *KO-LOC\_Os03g55050#2* showing the mutations which result in the deletion of alanine and a frameshift causing premature termination. **h-j**, Comparison of 1,000-grain weight (**h**), grain length (**i**) and grain width (**j**) between WYJ, *KO-LOC\_Os03g55050#1* and *KO-LOC\_Os03g55050#2* ( $n = 6$  plants). **k**, The relative expression

levels of *LOC\_Os03g55030* and *LOC\_Os03g55050* in young panicles of NIL-*GSAI*<sup>WYJ</sup> and NIL-*GSAI*<sup>CG14</sup> ( $n = 3$  biological replicates). The actin gene was used for normalization. The values in **c-e** and **h-k** represent the mean  $\pm$  s.d. *P* values in **c-e** and **h-k** from two-tailed Student's *t*-tests were indicated. Source data underlying Supplementary Figure 8c-e and 8h-k are provided as a Source Data file.

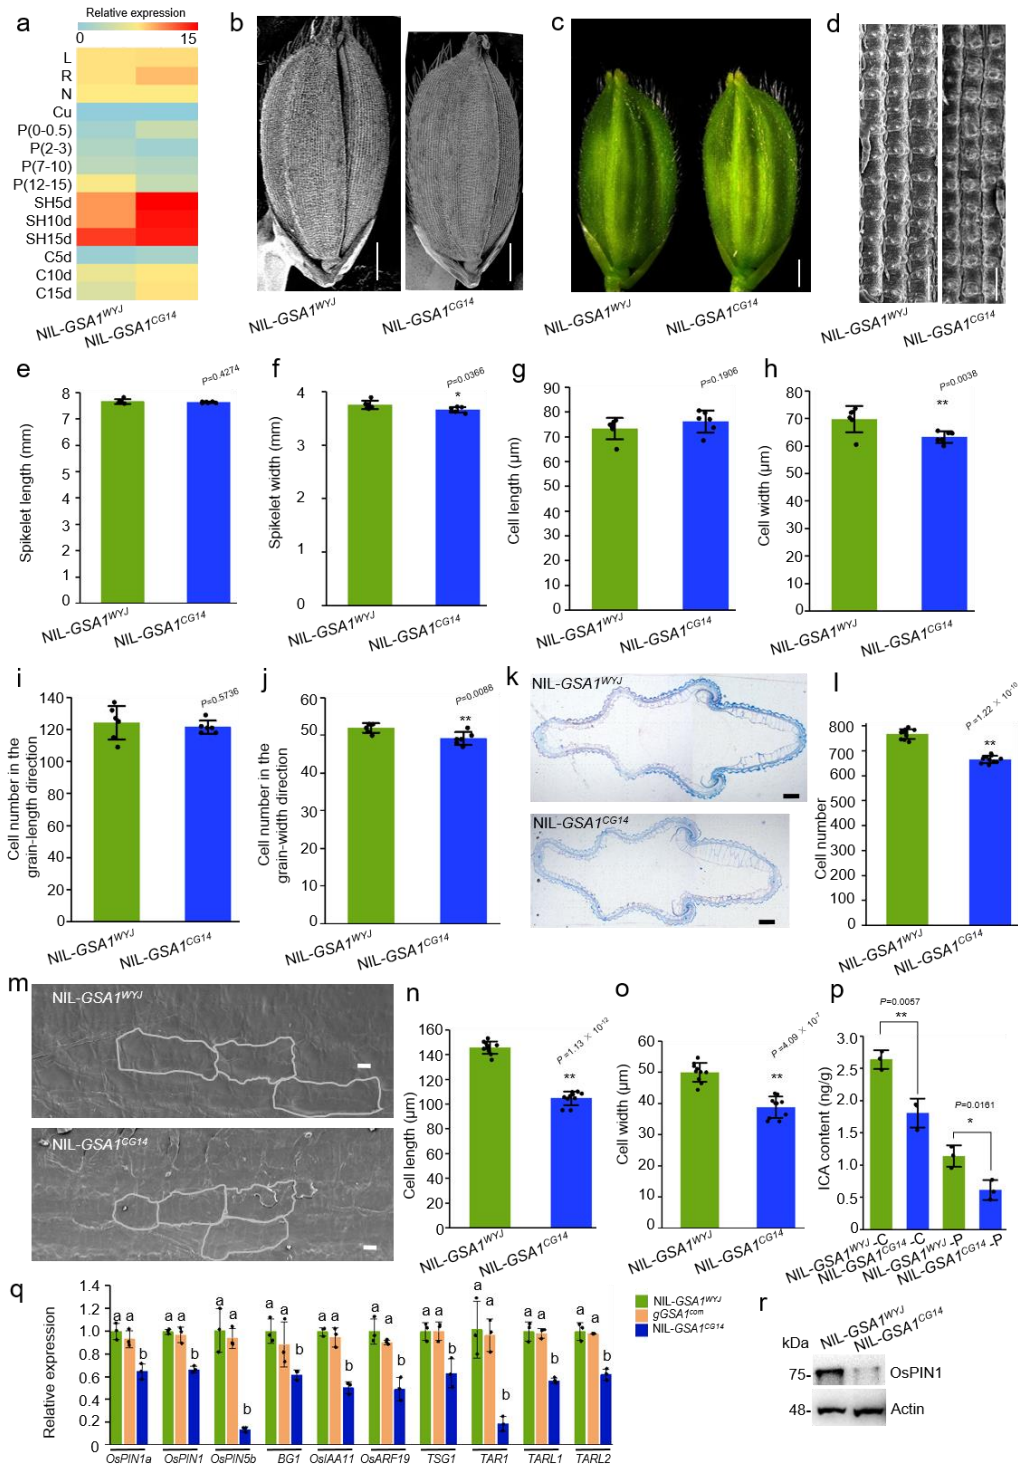

### Supplementary Figure 9. Spikelet development in NIL-*GSA1*<sup>WYJ</sup> and NIL-*GSA1*<sup>CG14</sup>.

**a**, Heat map of the relative expression levels of *GSA1* in NIL-*GSA1*<sup>WYJ</sup> and NIL-*GSA1*<sup>CG14</sup> leaves (L), roots (R), culm nodes (N), culms (Cu), young panicles (P, numbers in brackets indicate young panicle length), spikelet hulls (SH) and caryopses (C) determined by qRT-PCR ( $n = 3$  biological replicates). 5 d, 10 d and 15 d indicate 5 days, 10 days and 15 days after flowering. The actin gene was used for normalization. **b**, Scanning electron micrographs of the outer epidermal cells of NIL-*GSA1*<sup>WYJ</sup> and NIL-*GSA1*<sup>CG14</sup> spikelet hulls at the mature stage. Scale bar, 1 mm. **c**, Spikelets of NIL-*GSA1*<sup>WYJ</sup> and NIL-*GSA1*<sup>CG14</sup> at the booting stage. Scale bar, 1 mm. **d**, Scanning electron

micrographs of the outer epidermal cell of NIL-*GSAI*<sup>WYJ</sup> and NIL-*GSAI*<sup>CG14</sup> spikelet hulls at the booting stage. Scale bar, 100  $\mu$ m. **e-j**, Comparisons of spikelet length (**e**), spikelet width (**f**), outer epidermal cell length (**g**), outer epidermal cell width (**h**), cell number in the grain-length direction (**i**) and cell number in the grain-width direction (**j**) between NIL-*GSAI*<sup>WYJ</sup> and NIL-*GSAI*<sup>CG14</sup> spikelet hulls at the booting stage ( $n = 6$  grains). **k**, Cross sections of NIL-*GSAI*<sup>WYJ</sup> and NIL-*GSAI*<sup>CG14</sup> spikelet hulls. Scale bar, 200  $\mu$ m. **l**, Comparisons of cell numbers in the outer parenchymal cell layers of NIL-*GSAI*<sup>WYJ</sup> and NIL-*GSAI*<sup>CG14</sup> spikelet hulls ( $n = 10$  views). **m**, Scanning electron micrographs of the inner surfaces of NIL-*GSAI*<sup>WYJ</sup> and NIL-*GSAI*<sup>CG14</sup> spikelet hulls. Scale bar, 20  $\mu$ m. **n-o**, Comparisons of inner epidermal cell length (**n**) and inner epidermal cell width (**o**) between NIL-*GSAI*<sup>WYJ</sup> and NIL-*GSAI*<sup>CG14</sup> spikelet hulls ( $n = 10$  views). **p**, Comparison of the endogenous Indole-3-carboxaldehyde (ICA) levels in young caryopses (C, 10 days after flowering) and young panicles (P, ~10 cm) at the booting stage between NIL-*GSAI*<sup>WYJ</sup> and NIL-*GSAI*<sup>CG14</sup> ( $n = 3$  biological replicates). The values in **e-j**, **l** and **n-p** represent the mean  $\pm$  s.d. \* $P < 0.05$  and \*\* $P < 0.01$  indicate significant differences compared with NIL-*GSAI*<sup>WYJ</sup> in two-tailed Student's *t*-tests. **q**, The relative expression levels of auxin related genes in 14 day old seedlings of NIL-*GSAI*<sup>WYJ</sup>, *gGSAI*<sup>com</sup> and NIL-*GSAI*<sup>CG14</sup> determined by qRT-PCR. The values represent the mean  $\pm$  s.d. ( $n = 3$  biological replicates). Different letters indicate significant differences ( $P < 0.05$ ) determined by Duncan's multiple range test. **r**, Immunoblotting assays of endogenous OsPIN1 protein levels in NIL-*GSAI*<sup>WYJ</sup> and NIL-*GSAI*<sup>CG14</sup>. Young panicle samples were subjected to immunoblot analysis with anti-PIN1 antibody (Abiocode, 1:2,000 dilution). The loading control was visualized using the anti-actin antibody (Abmart, M20009, 1:2,000 dilution). All analyses were repeated independently at least three times. Source data underlying Supplementary Figure 9a, 9e-j, 9l and 9n-r are provided as a Source Data file.

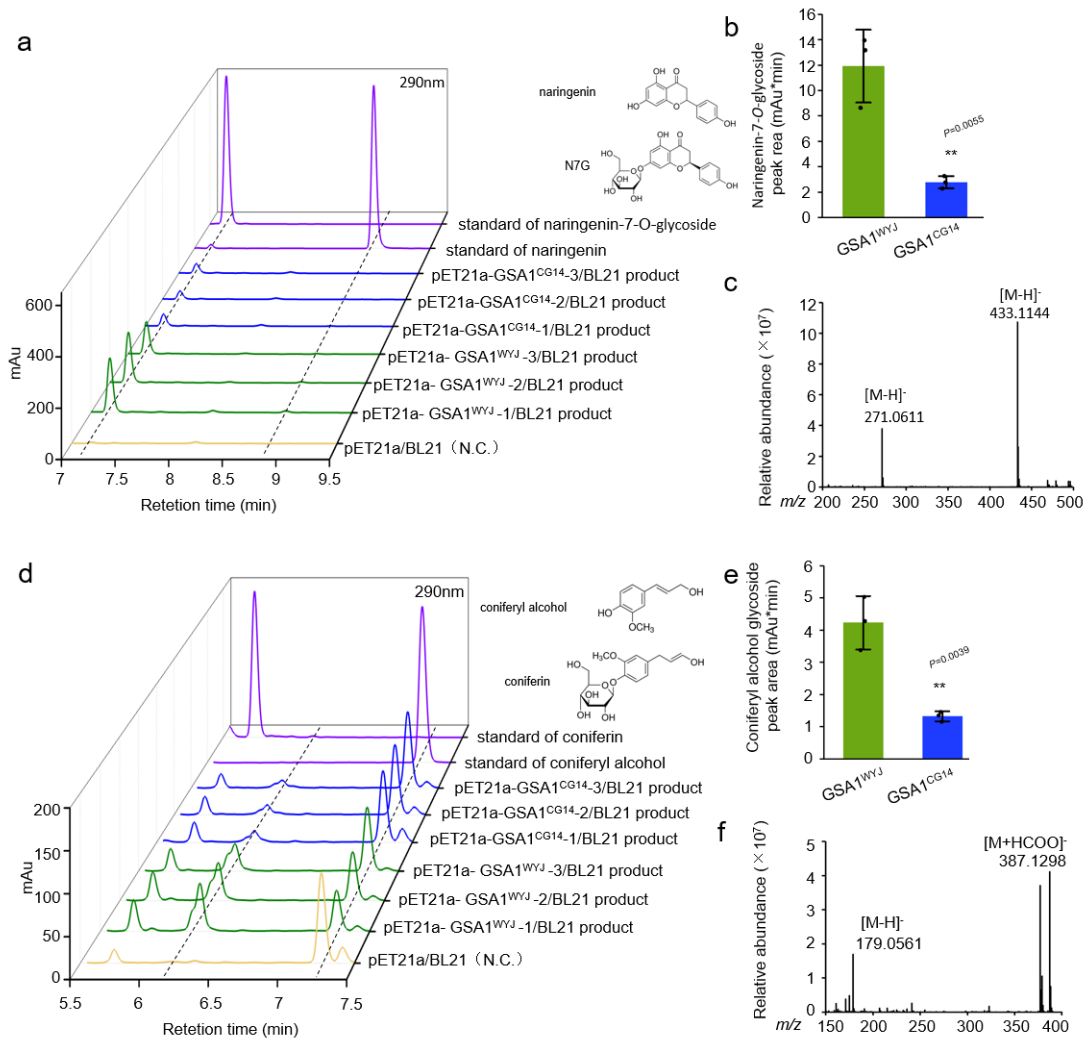

### Supplementary Figure 10. Glucosyltransferase activity of GSA1 towards naringenin and coniferyl alcohol.

**a**, The *in vitro* glucosyltransferase activity of GSA1<sup>WYJ</sup> and GSA1<sup>CG14</sup> towards naringenin determined by HPLC analyses. N.C., negative control. N7G, naringenin-7-*O*-glycoside. **b**, Comparison of the peak areas of naringenin-7-*O*-glycoside produced by GSA1<sup>WYJ</sup> and GSA1<sup>CG14</sup>. **c**, MS analyses of the glucoside products produced by GSA1<sup>WYJ</sup>. Mass spectra of naringenin consisted of a parent molecule ion with  $m/z$  271.0611 [M-H]<sup>-</sup> and naringenin-7-*O*-glycoside with  $m/z$  433.1144 [M-H]<sup>-</sup>. **d**, The *in vitro* glucosyltransferase activity of GSA1<sup>WYJ</sup> and GSA1<sup>CG14</sup> towards coniferyl alcohol determined by HPLC analyses. N.C., negative control. **e**, Comparison of the peak areas of coniferyl alcohol glycoside produced by GSA1<sup>WYJ</sup> and GSA1<sup>CG14</sup>. The values in **b** and **e** represent the mean  $\pm$  s.d. ( $n = 3$  biological replicates). \*\* $P < 0.01$  indicates significant differences compared with GSA1<sup>WYJ</sup> in two-tailed Student's *t*-tests (**b**, **e**). **f**, MS analyses of the glucoside products produced by GSA1<sup>WYJ</sup>. Mass spectra of coniferyl alcohol consisted of a parent molecule ion with  $m/z$  179.0561 [M-H]<sup>-</sup> and a coniferin methanoic acid adduct with  $m/z$  387.1298 [M+HCOO]<sup>-</sup>. Source data underlying Supplementary Figure 10b and 10e are provided as a Source Data file.

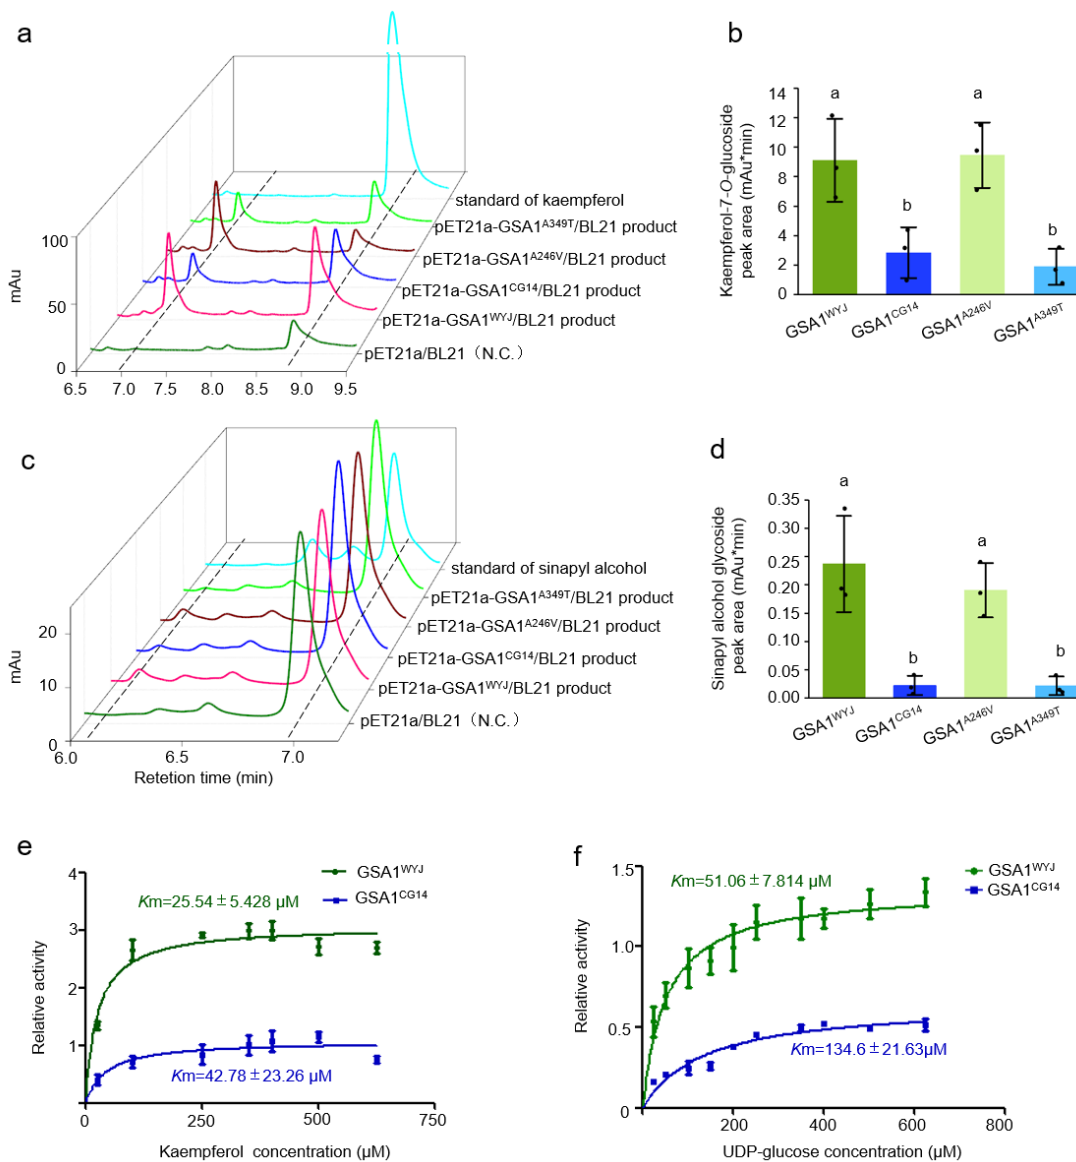

**Supplementary Figure 11. Identification of the key amino acids influencing glucosyltransferase activity of GSA1 and analysis of the GSA1 enzyme kinetics.**

**a**, The *in vitro* glucosyltransferase activity of GSA1<sup>WYJ</sup>, GSA1<sup>CG14</sup>, GSA1<sup>A246V</sup> and GSA1<sup>A349T</sup> towards kaempferol determined by HPLC analyses. N.C., negative control. **b**, Comparison of the peak areas of kaempferol-7-O-glucoside produced by GSA1<sup>WYJ</sup>, GSA1<sup>CG14</sup>, GSA1<sup>A246V</sup> and GSA1<sup>A349T</sup>. **c**, The *in vitro* glucosyltransferase activity of GSA1<sup>WYJ</sup>, GSA1<sup>CG14</sup>, GSA1<sup>A246V</sup> and GSA1<sup>A349T</sup> towards sinapyl alcohol determined by HPLC analyses. N.C., negative control. **d**, Comparison of the peak areas of sinapyl alcohol glycoside produced by GSA1<sup>WYJ</sup>, GSA1<sup>CG14</sup>, GSA1<sup>A246V</sup> and GSA1<sup>A349T</sup>. The values in **b** and **d** represent the mean  $\pm$  s.d. ( $n = 3$  biological replicates). Different letters indicate significant differences ( $P < 0.05$ ) determined by Duncan's multiple range test. **e**, **f**, Characterization of GSA1 enzymatic activity. The kinetic parameter  $K_m$  of GSA1 towards kaempferol (**e**) and UDP-glucose (**f**) using kaempferol as sugar acceptor was calculated using GraphPad Prism 5 software. The values in **e** and **f** represent the mean  $\pm$  s.d. ( $n = 3$  biological replicates). The UDP-glucose was excess (2.5 mM) (**e**). The kaempferol was excess (2.5 mM) (**f**). Source data underlying Supplementary Figure 11b and 11d-f are provided as a Source Data file.

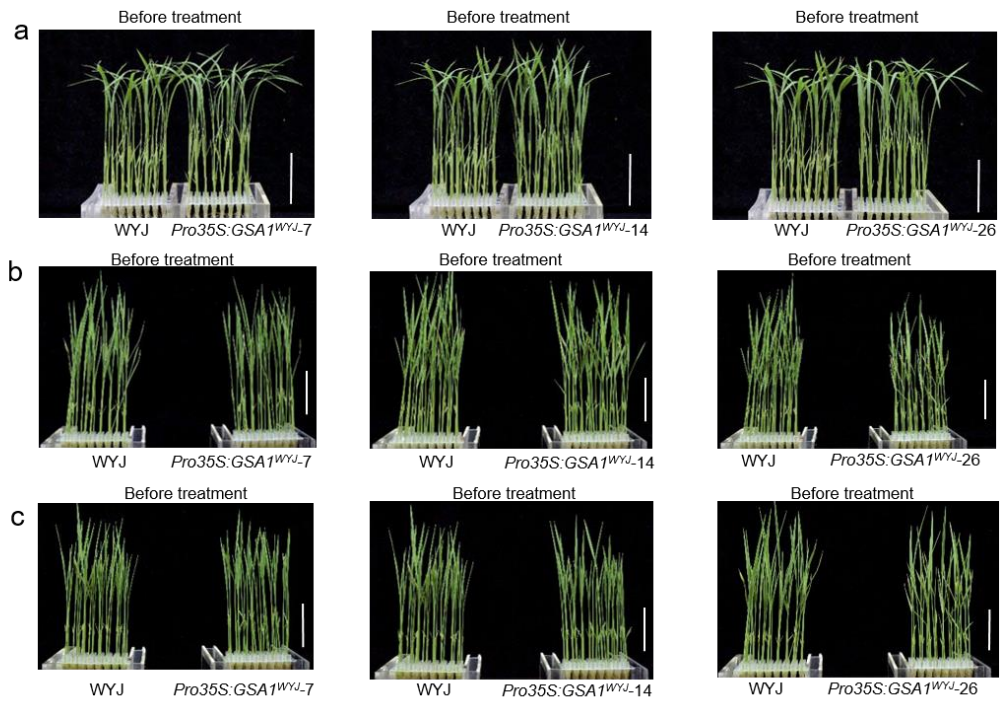

**Supplementary Figure 12. WYJ and overexpression lines before abiotic stress treatment.** **a-c**, WYJ and overexpression lines grown under normal conditions for 14 days before NaCl treatment (**a**), heat treatment (**b**) and PEG treatment (**c**). At least three biological replicates (24 plants per biological replicate) were used in **a-c**. Scale bar, 5 cm.



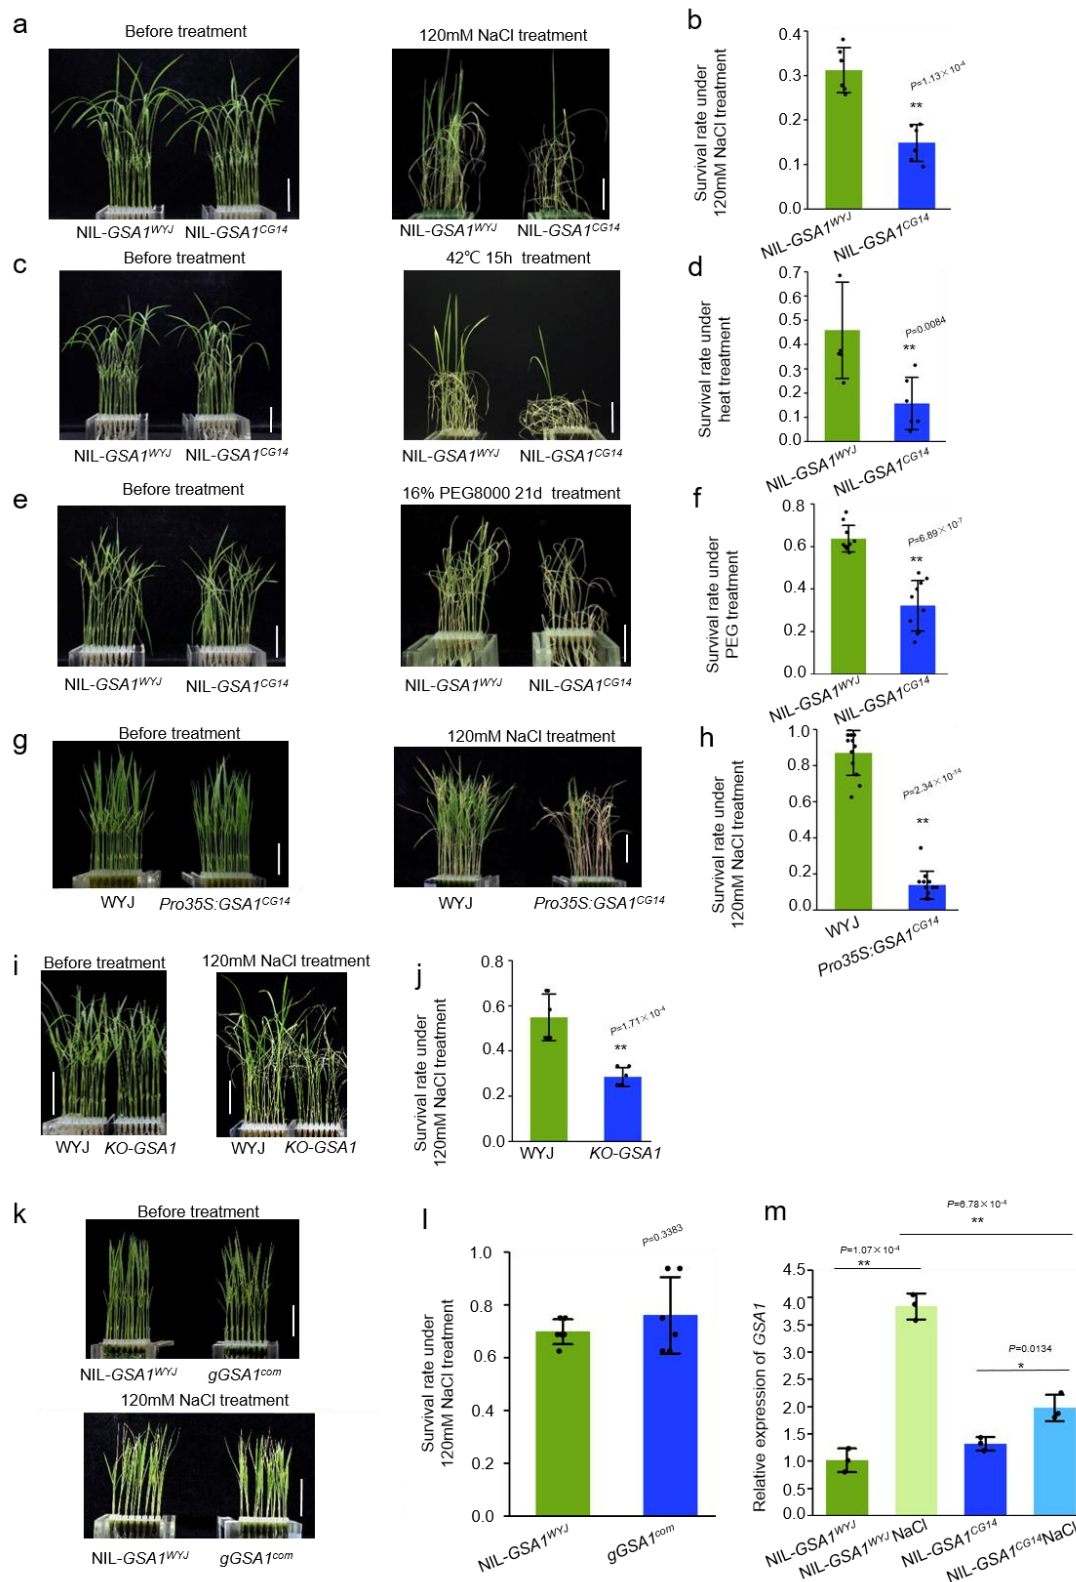

### Supplementary Figure 13. *GSA1* is involved in abiotic stress tolerance

**a**, NIL-*GSA1*<sup>WYJ</sup> and NIL-*GSA1*<sup>CG14</sup> plants grown under normal conditions for 14 days (left), then transferred to 120 mM NaCl for 7 days and recovered for 7 days (right). Scale bar, 5 cm. **b**, Relative survival rates of NIL-*GSA1*<sup>WYJ</sup> and NIL-*GSA1*<sup>CG14</sup> seedlings after NaCl treatment ( $n = 6$  biological replicates). **c**, NIL-*GSA1*<sup>WYJ</sup> and NIL-*GSA1*<sup>CG14</sup> plants grown under normal conditions

for 14 days (left), then transferred to 42°C for 15 hours and recovered for 7 days (right). Scale bar, 5 cm. **d**, Relative survival rates of NIL-*GSAI*<sup>WYJ</sup> and NIL-*GSAI*<sup>CG14</sup> seedlings after heat treatment ( $n = 6$  biological replicates). **e**, NIL-*GSAI*<sup>WYJ</sup> and NIL-*GSAI*<sup>CG14</sup> plants grown under normal conditions for 14 days (left), then transferred to 16% PEG for 21 days and recovered for 7 days (right). Scale bar, 5 cm. **f**, Relative survival rates of NIL-*GSAI*<sup>WYJ</sup> and NIL-*GSAI*<sup>CG14</sup> seedlings after PEG treatment ( $n = 10$  biological replicates). **b**, **d**, **f**, 24 plants per biological replicate. **g**, WYJ and *Pro35S*:*GSAI*<sup>CG14</sup> grown under normal conditions for 14 days before NaCl treatment (left), then transferred to 120 mM NaCl for 7 days and recovered for 7 days (right). Scale bar, 5 cm. **h**, Relative survival rates of WYJ and *Pro35S*:*GSAI*<sup>CG14</sup> seedlings after NaCl treatment ( $n = 12$  biological replicates, 32 plants per biological replicate). **i**, WYJ and *KO-GSAI* grown under normal conditions for 14 days before NaCl treatment (left), then transferred to 120 mM NaCl for 7 days and recovered for 7 days (right). Scale bar, 5 cm. **j**, Relative survival rates of WYJ and *KO-GSAI* seedlings after NaCl treatment ( $n = 6$  biological replicates, 24 plants per biological replicate). **k**, NIL-*GSAI*<sup>WYJ</sup> and *gGSAI*<sup>com</sup> grown under normal conditions for 14 days before NaCl treatment (upper), then transferred to 120 mM NaCl for 7 days and recovered for 7 days (lower). Scale bar, 5 cm. **l**, Relative survival rates of NIL-*GSAI*<sup>WYJ</sup> and *gGSAI*<sup>com</sup> seedlings after NaCl treatment ( $n = 6$  biological replicates, 16 plants per biological replicate). **m**, The relative expression levels of *GSAI* before and after NaCl treatment for 5 days in NIL-*GSAI*<sup>WYJ</sup> and NIL-*GSAI*<sup>CG14</sup> ( $n = 3$  biological replicates). The ubiquitin gene was used for normalization. The values in **b**, **d**, **f**, **h**, **j**, **l** and **m** represent the mean  $\pm$  s.d. \* $P < 0.05$  and \*\* $P < 0.01$  indicates significant differences compared with NIL-*GSAI*<sup>WYJ</sup> or WYJ in two-tailed Student's *t*-tests. Source data underlying Supplementary Figure 13b, 13d, 13f, 13h, 13j, 13l and 13m are provided as a Source Data file.

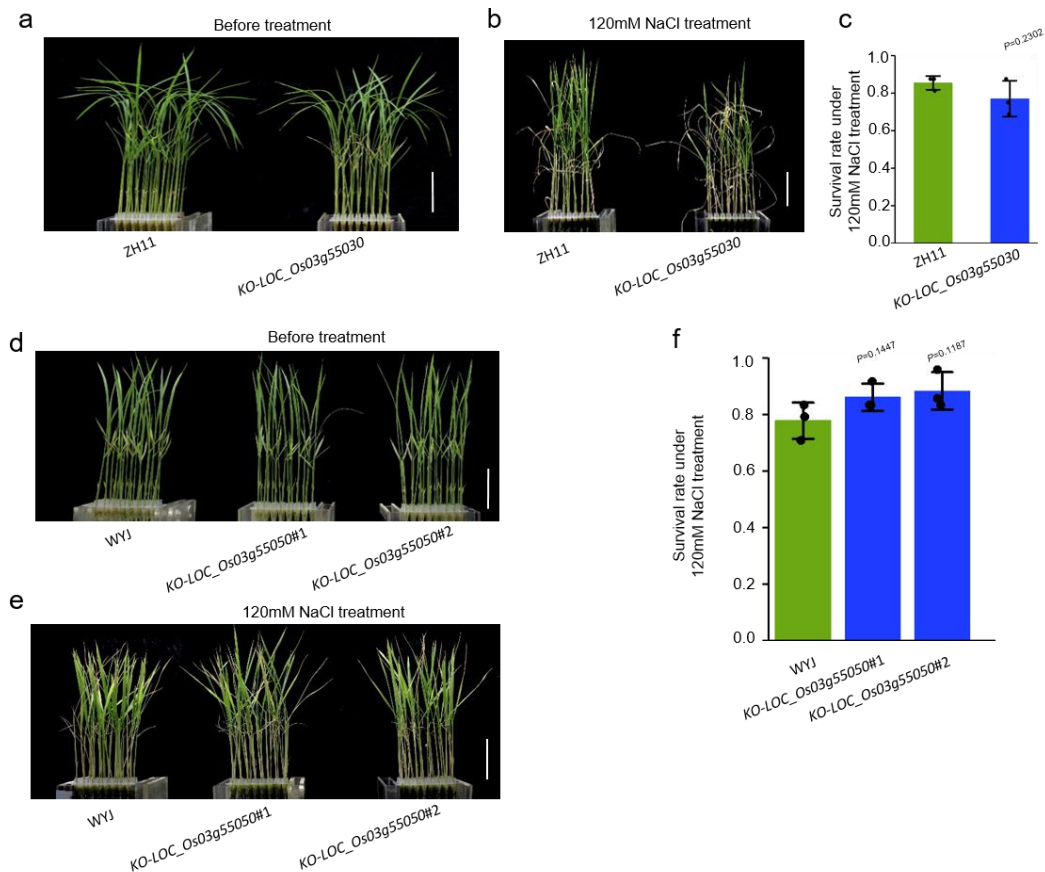

**Supplementary Figure 14. The other UGT genes within the *GSA1* target region have no effect on abiotic stress tolerance.**

**a**, ZH11 and the *LOC\_Os03g55030* knock-out line *KO-LOC\_Os03g55030* grown under normal conditions for 14 days before NaCl treatment, Scale bar, 5 cm. **b**, ZH11 and *KO-LOC\_Os03g55030* transferred to 120 mM NaCl for 7 days and recovered for 7 days. Scale bar, 5 cm. **c**, Relative survival rates of ZH11 and *KO-LOC\_Os03g55030* seedlings after NaCl treatment ( $n = 3$  biological replicates, 16 plants per biological replicate). **d**, WYJ and *LOC\_Os03g55050* knock-out lines *KO-LOC\_Os03g55050#1* and #2 grown under normal conditions for 14 days before NaCl treatment, Scale bar, 5 cm. **e**, WYJ and *KO-LOC\_Os03g55050#1* and #2 transferred to 120 mM NaCl for 7 days and recovered for 7 days. Scale bar, 5 cm. **f**, Relative survival rates of WYJ and *KO-LOC\_Os03g55050#1* and #2 seedlings after NaCl treatment ( $n = 3$  biological replicates, 24 plants per biological replicate). The values in **c** and **f** represent the mean  $\pm$  s.d. *P* values in **c** and **f** from two-tailed Student's *t*-tests were indicated. Source data underlying Supplementary Figure 14c and 14f are provided as a Source Data file.

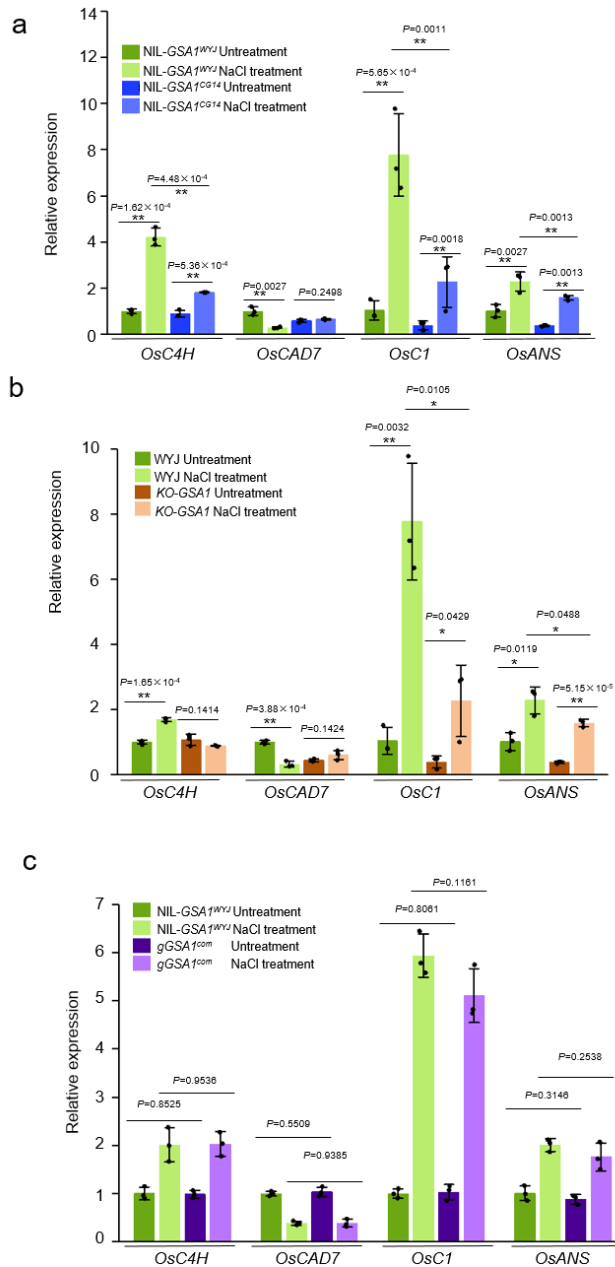

**Supplementary Figure 15. GSA1 is required for the activation of flavonoid biosynthesis and down-regulation of the lignin pathway under abiotic stress.**

**a**, The relative expression levels of *OsC4H*, *OsCAD7*, *OsC1* and *OsANS* determined by qRT-PCR before and after NaCl treatment in NIL-*GSA1*<sup>WYJ</sup> and NIL-*GSA1*<sup>CG14</sup> seedlings ( $n = 3$  biological replicates). **b**, The relative expression levels of *OsC4H*, *OsCAD7*, *OsC1* and *OsANS* determined by qRT-PCR before and after NaCl treatment in WYJ and KO-*GSA1* seedlings ( $n = 3$  biological replicates). **c**, The relative expression levels of *OsC4H*, *OsCAD7*, *OsC1* and *OsANS* determined by qRT-PCR before and after NaCl treatment in NIL-*GSA1*<sup>WYJ</sup> and *gGSA1*<sup>com</sup> seedlings ( $n = 3$  biological replicates). The ubiquitin gene was used for normalization. The values in **a-c** represent the mean  $\pm$  s.d. \* $P < 0.05$  and \*\* $P < 0.01$  indicates significant differences compared with NIL-*GSA1*<sup>WYJ</sup> or WYJ in two-tailed Student's *t*-tests. Source data are provided as a Source Data file.

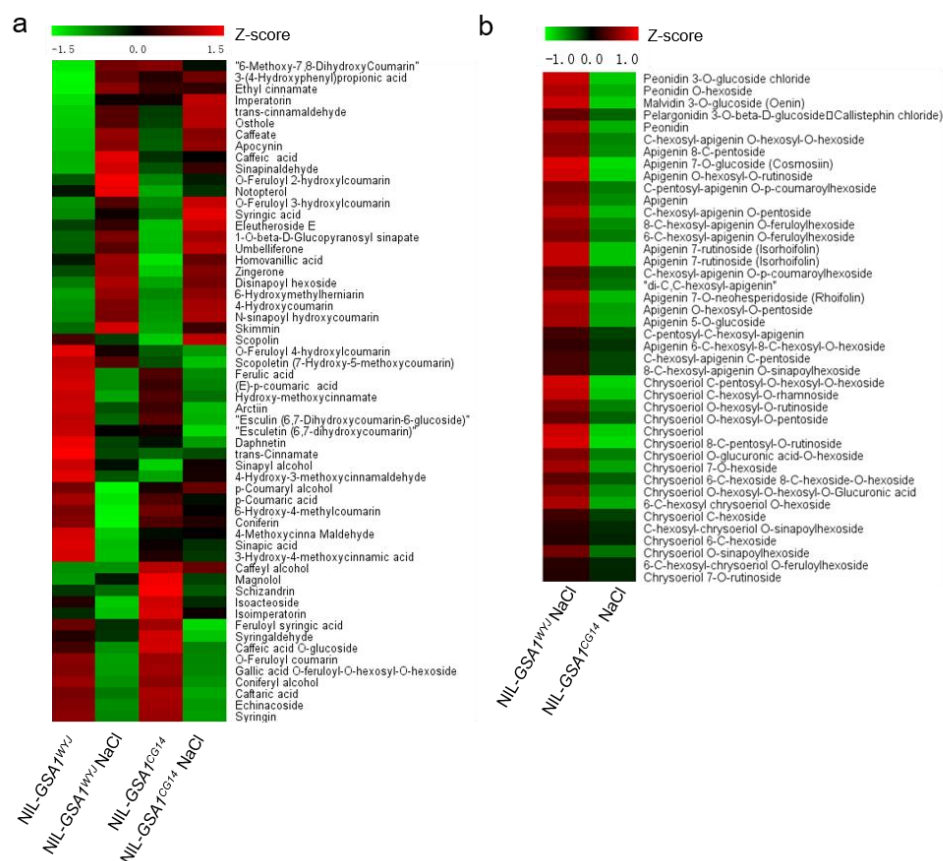

**Supplementary Figure 16. The redirection of metabolic flux after NaCl treatment in NIL-GSA1<sup>WYJ</sup> and NIL-GSA1<sup>CG14</sup>.**

**a**, Clustering heat maps of the relative levels of phenylpropanoid metabolites including lignin pathway metabolites in NIL-GSA1<sup>WYJ</sup> and NIL-GSA1<sup>CG14</sup> seedlings before and after NaCl treatment. **b**, Clustering heat maps of the relative levels of anthocyanins, apigenin derivatives and chrysoeriol derivatives in NIL-GSA1<sup>WYJ</sup> and NIL-GSA1<sup>CG14</sup> seedlings after NaCl treatment. **a**, **b**, Standard-scores (Z-scores) were used as the numerical signs to evaluate the standard deviations from the mean of the corresponding samples. Source data are provided as a Source Data file.

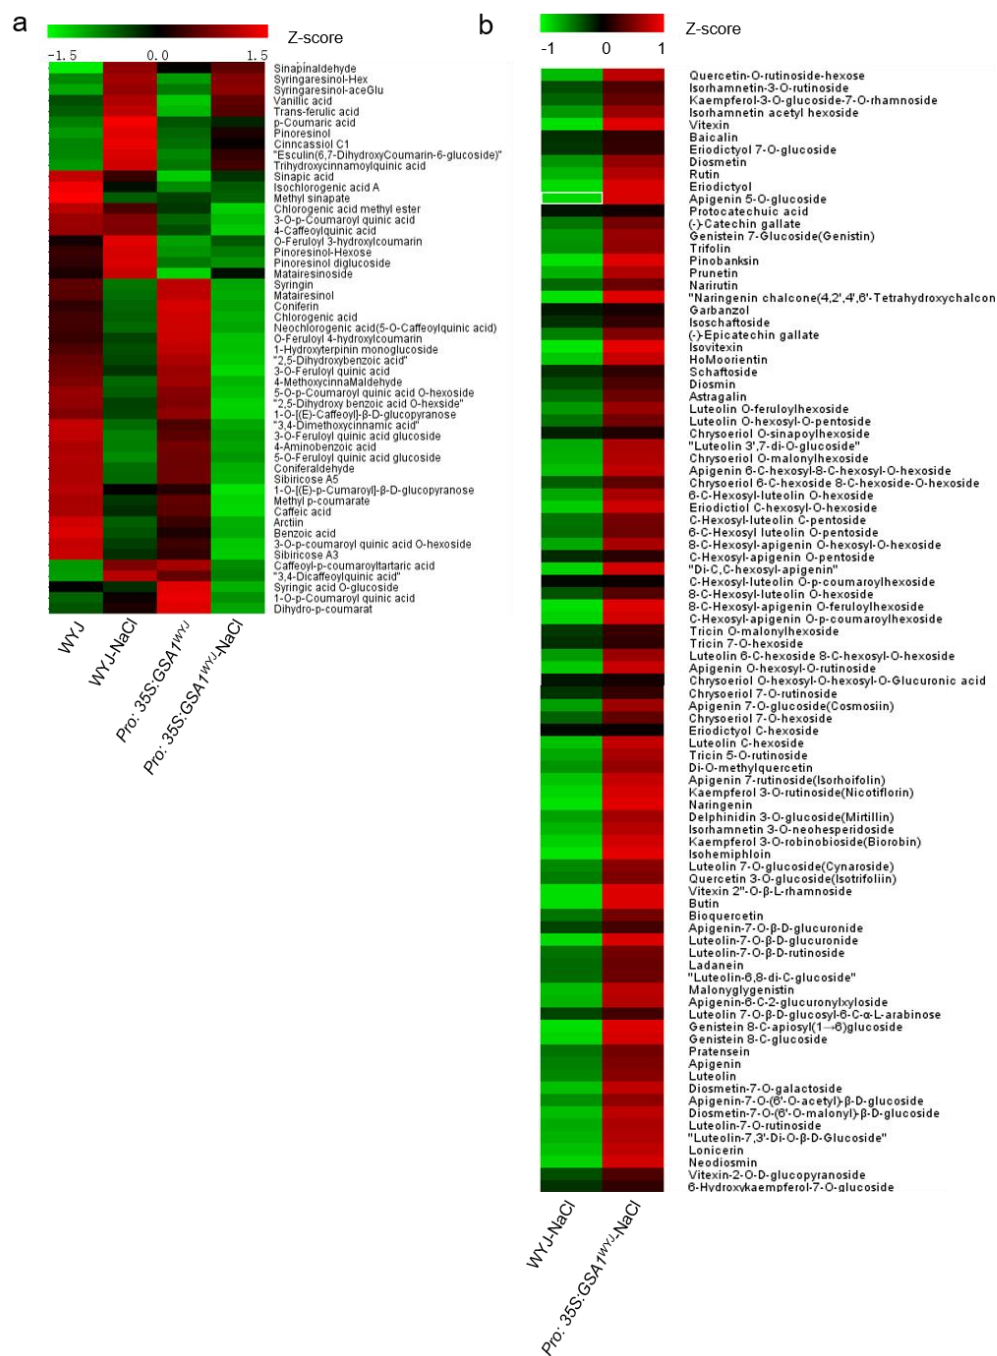

**Supplementary Figure 17. The redirection of metabolic flux after NaCl treatment in WYJ and *Pro35S:GSAI*<sup>WYJ</sup>.**

**a**, Clustering heat maps of the relative levels of phenylpropanoid metabolites including lignin pathway metabolites in WYJ and *Pro35S:GSAI*<sup>WYJ</sup> seedlings before and after NaCl treatment. **b**, Clustering heat maps of the relative levels of flavonoid glycosides in WYJ and *Pro35S:GSAI*<sup>WYJ</sup> seedlings after NaCl treatment. **a**, **b**, Standard-scores (Z-scores) were used as the numerical signs to evaluate the standard deviations from the mean of the corresponding samples. Source data are provided as a Source Data file.

**Supplementary Table 1. *GSAI* is a QTL contributing to grain size.**

|                    | LOD   | % VAR | Additive effect | Molecular marker   |
|--------------------|-------|-------|-----------------|--------------------|
| 1,000-grain weight | 5.734 | 14.5% | -0.755          | D3-125.1~D3-125.48 |
| grain length       | 7.570 | 18.6% | -0.074          | D3-125.1~D3-125.48 |
| grain width        | 5.567 | 14.1% | -0.029          | D3-125.1~D3-125.48 |

**Supplementary Table 2. Mutation sites in *KO-GSAI* lines.**

| Lines          | <i>KO-GSAI</i> #13 | <i>KO-GSAI</i> #22             | <i>KO-GSAI</i> #26 |
|----------------|--------------------|--------------------------------|--------------------|
| Mutation sites | Deletion:79-113    | Deletion:72-79<br>Deletion:115 | Deletion:79-113    |

**Supplementary Table 3. Primers used in this study.**

| Primer name          | Sequence 5'-3'                                       | Purpose              |
|----------------------|------------------------------------------------------|----------------------|
| D3-122.1-F           | TGTAAATGAACGATGCAAGC                                 | Map-based cloning    |
| D3-122.1-R           | TGTTGACAACGAGCTAATCA                                 | Map-based cloning    |
| D3-122.11-F          | GGTAATAACACATGCCATCG                                 | Map-based cloning    |
| D3-122.11-R          | AGGTTACCTCTGCTTTATTTGA                               | Map-based cloning    |
| D3-124.1-F           | TGGCCACTGAATGAATAACT                                 | Map-based cloning    |
| D3-124.1-R           | CCAGTGATGGTGGTGTTAAT                                 | Map-based cloning    |
| D3-124.11-F          | CTGTTTGGAACTTTAGGGAC                                 | Map-based cloning    |
| D3-124.11-R          | ATACGCCTGAGGTAATCTTG                                 | Map-based cloning    |
| D3-125.1-F           | GCAAGATGGCAAAGTCGC                                   | Map-based cloning    |
| D3-125.1-R           | CTTTTCAGTCACATCGTATTAAT                              | Map-based cloning    |
| D3-125.48-F          | TATCGGATGGTCTAATCAGC                                 | Map-based cloning    |
| D3-125.48-R          | AGGTCAGGACTCATGATCAT                                 | Map-based cloning    |
| D3-125.8-F           | ATTTGGGGTGCTACTCAGAT                                 | Map-based cloning    |
| D3-125.8-R           | AAAGACATCTACGGGCATATT                                | Map-based cloning    |
| D3-125.107-F         | ATGCTCCTGTTGTCATTCTT                                 | Map-based cloning    |
| D3-125.107-R         | GGGCAAATACCAACATTGAT                                 | Map-based cloning    |
| D3-125.112-F         | TACTTATGCCCGCTATAGGA                                 | Map-based cloning    |
| D3-125.112-R         | GCAACATAAACATCGAGAAATG                               | Map-based cloning    |
| D3-125.125-F         | GATCAAGATGACACAACCCT                                 | Map-based cloning    |
| D3-125.125-R         | TGCATGCATGTATGTACGAT                                 | Map-based cloning    |
| D3-125.18-F          | AGTTTGCAGTCTGTGAGATT                                 | Map-based cloning    |
| D3-125.18-R          | CTGACAACCATCCTTACCAC                                 | Map-based cloning    |
| D3-125.37-F          | GGCGACATGGATTGAGATC                                  | Map-based cloning    |
| D3-125.37-R          | GTTGAAACTAACCGGAGAAT                                 | Map-based cloning    |
| D3-125.49-F          | CTGCATTATTGTTAATATTACGG                              | Map-based cloning    |
| D3-125.49-R          | CCTATGTAAGAGACTGCACA                                 | Map-based cloning    |
| 1306- <i>GSAI</i> -R | ATCCAAGGGCGAATTGGTCGACTCTAGACTGTTCTCTT<br>AGCAAATTCA | Transgenic construct |

|                    |                                                      |                                |
|--------------------|------------------------------------------------------|--------------------------------|
| 1306-GSAI-F        | AGAGAACACGGGGGACGAGCTCGGTACCATGGCGGC<br>TCCTCCTCCTCC | Transgenic construct           |
| KO-GSAI-1F         | GGCAGGCCATGTCATGCCTCTGA                              | Transgenic construct           |
| KO-GSAI-1R         | AAACTCAGAGGCATGACATGGCC                              | Transgenic construct           |
| KO-GSAI-2F         | GCCGCTCGTCGGCCTCGGCTTCG                              | Transgenic construct           |
| KO-GSAI-2R         | AAACCGAAGCCGAGGCCGACGAG                              | Transgenic construct           |
| qGSAI-F            | CGCACAGGCTGCAAGTC                                    | qPCR                           |
| qGSAI-R            | GTGGGTCTCAATTGGATCATCTC                              | qPCR                           |
| q030-F             | GAACTCGACGCTGGAAGG                                   | qPCR ( <i>LOC_Os03g55030</i> ) |
| q030-R             | CACACGGCGGTGATGTAG                                   | qPCR ( <i>LOC_Os03g55030</i> ) |
| q050-F             | CCGTTCTTATGCTGGCCTTAT                                | qPCR ( <i>LOC_Os03g55050</i> ) |
| q050-R             | GTTCTTGATCTCCTCCTGTGTG                               | qPCR ( <i>LOC_Os03g55050</i> ) |
| PAL4-F             | CTTACAACAGCTAATCGAG                                  | qPCR                           |
| PAL4-R             | CGCACTCCATTTCAGTACCA                                 | qPCR                           |
| OsC4H-F            | GCAAGAGAGTGATGGAACAGA                                | qPCR                           |
| OsC4H-R            | CGTTGATGTTCTCGACGATGTA                               | qPCR                           |
| COMT-F             | GAAGGTGGTGGTGGTGGAGT                                 | qPCR                           |
| COMT-R             | GCGTTGGCGTAGATGTAGGTG                                | qPCR                           |
| CCR1-F             | CTCATCCGTGGCTACCACGTC                                | qPCR                           |
| CCR1-R             | GGGTAGGACTTCTTGGTGCC                                 | qPCR                           |
| OsCAD7-F           | TAGCCAGCTAGCAACCGACAA                                | qPCR                           |
| OsCAD7-R           | CCGCCGGAGCAGTAGTTCT                                  | qPCR                           |
| F3 <sup>H</sup> -F | ATACCATTCGGAGCAGGA                                   | qPCR                           |
| F3 <sup>H</sup> -R | TGGCAGTCATCAGTGTGA                                   | qPCR                           |
| CHS-F              | TTGGGCTGGACAAGGAGAGGATGA                             | qPCR                           |
| CHS-R              | AGGACGACGGTCTCAACGGTGA                               | qPCR                           |
| CHI-F              | CAGTACTCGGACAAGGTGAC                                 | qPCR                           |
| CHI-R              | GGAGTGGGTGAAGAGGAT                                   | qPCR                           |
| OsC1-F             | GAATTAGGAGACGGCGATGA                                 | qPCR                           |
| OsC1-R             | TCACGCACACAAGTTCCA                                   | qPCR                           |
| ANS-F              | CAGCTCAAGATCAACTACTAC                                | qPCR                           |
| ANS-R              | GTGGAGGATGAAGGAGAG                                   | qPCR                           |
| OsP1-F             | TGGATCAACTACCTGAGA                                   | qPCR                           |
| OsP1-R             | ATGGAGCTTGATGATGAC                                   | qPCR                           |
| OsPIN1a-F          | TCATCTGGTCGCTCGTCTGC                                 | qPCR                           |
| OsPIN1a-R          | CGAACGTCGCCACCTTGTTT                                 | qPCR                           |
| OsPIN1-F           | TGCACCCTAGCATTCTCAGCA                                | qPCR                           |
| OsPIN1-R           | CCCTCCTCCCAAATTCTACTTC                               | qPCR                           |
| OsPIN5b-F          | GGGCAGCAGGAGAGGGTGATAG                               | qPCR                           |
| OsPIN5b-R          | GAATCGGCAGAGAGATCAATGT                               | qPCR                           |
| BG1-F              | GATGGAGAGCGACGAGGAC                                  | qPCR                           |
| BG1-R              | GCAATGGCGGCGAAGTTC                                   | qPCR                           |
| OsIAA11-F          | GCGCTGGTGAAGGTGAGCAT                                 | qPCR                           |
| OsIAA11-R          | ACGTACTCCAGGTCATCTCT                                 | qPCR                           |



|                    |                            |                      |
|--------------------|----------------------------|----------------------|
| <i>OsARF19-F</i>   | TCAATGAGTTAGCAAAGGC        | qPCR                 |
| <i>OsARF19-R</i>   | TTTGATTTTGGACAAGGAC        | qPCR                 |
| <i>TSG1-F</i>      | ATAGGGAGGATGTGGAGGATT      | qPCR                 |
| <i>TSG1-R</i>      | AGAGGCGGTTGATGAAGATG       | qPCR                 |
| <i>TAR1-F</i>      | CTCTTCACCGTCTCCAAGTG       | qPCR                 |
| <i>TAR1-R</i>      | GATGGTGTGAGCTCGATGA        | qPCR                 |
| <i>TARL1-F</i>     | AACCGGATCAAAGAGCCATC       | qPCR                 |
| <i>TARL1-R</i>     | CTTCGGCCTCGGATAAAGTG       | qPCR                 |
| <i>TARL2-F</i>     | AAGACGACGACTGCTACGA        | qPCR                 |
| <i>TARL2-R</i>     | CAAATTCGGTGATCCTCTCCAG     | qPCR                 |
| <i>ACTIN-F</i>     | TGCTATGTACGTCGCCATCCAG     | qPCR(LOC_Os03g50885) |
| <i>ACTIN-R</i>     | AATGAGTAACCACGCTCCGTCA     | qPCR(LOC_Os03g50885) |
| <i>UBIQUITIN-F</i> | GACGGACGCACCCTGGCTGACTAC   | qPCR(LOC_Os03g13170) |
| <i>UBIQUITIN-R</i> | TGCTGCCAATTACCATATACCACGAC | qPCR(LOC_Os03g13170) |

---
